# Supplementary material for: Enhanced bi-stability in a ruthenium alkynyl spiropyran complex
Source: Royal Society of Chemistry journal article supplement (doi:10.1039/c5dt01107h), 2015-01-01
Supplement: c5dt01107h1.pdf [file c5dt01107h1.pdf]

Electronic Supplementary Material for

**Bi-stability mediated by spirocyan ruthenium alkynyl complexes**

Mark C. Walkey, Lindsay T. Byrne, Matthew J. Piggott, Paul J. Low and George A. Koutsantonis

**S1.0 Synthesis**

**S1.1 Synthetic Route**

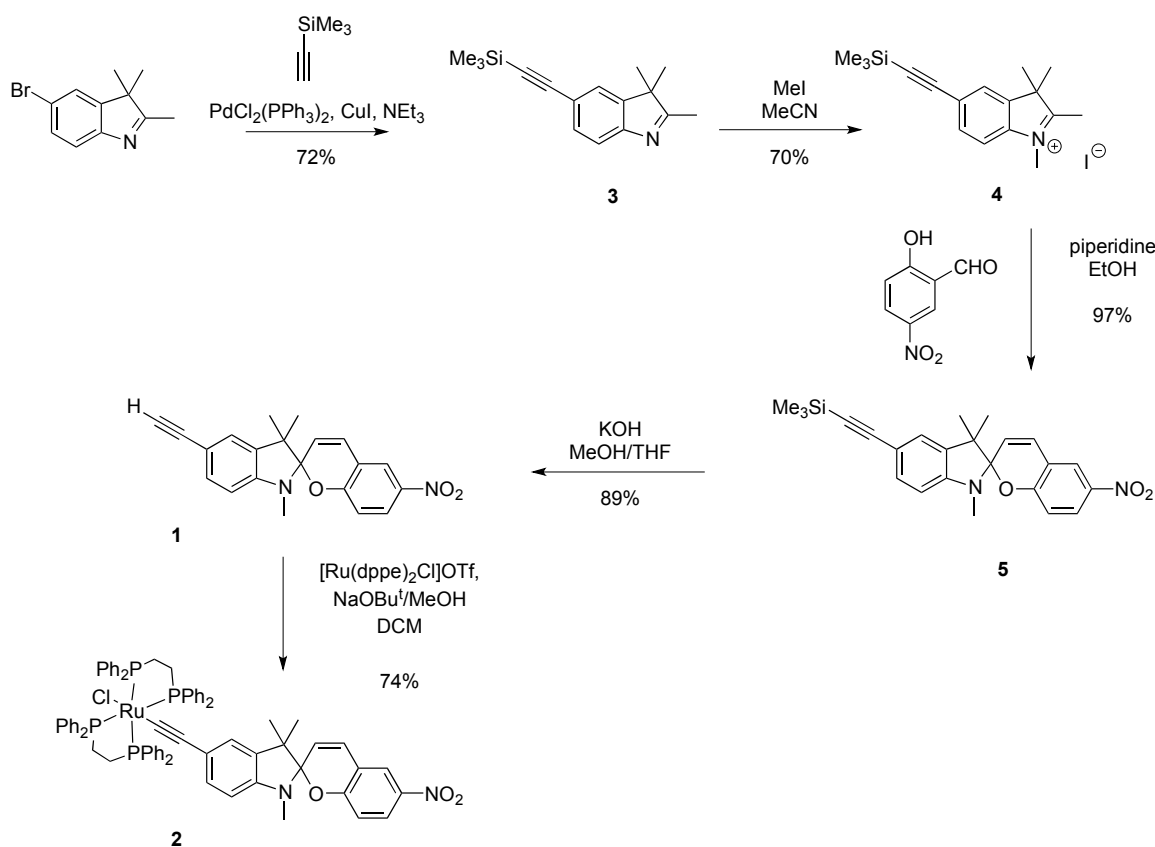

**Figure 1** The synthetic route used to make the ligand **1** and the ruthenium complex **2**

**S1.2 General Information**

Solvents for general procedures were distilled prior to use, while anaerobic solvents used in the synthesis of **2** prepared by appropriate means<sup>1</sup> and stored under argon. Organic extracts were dried over  $\text{MgSO}_4$ . Thin-layer chromatography was performed on Chem-Supply 60 F<sub>254</sub> silica gel plates and visualised with UV light (254 nm). Nuclear magnetic resonance spectra were acquired on a Bruker AV-600 spectrometer and referenced with respect to residual solvent signals or an external capillary of 85%  $\text{H}_3\text{PO}_4$  for  $^{31}\text{P}$  NMR spectra. Assignments were made with the aid of DEPT, HSQC and HMBC experiments. Infrared spectra were recorded on a PerkinElmer Spectrum One FT-IR spectrometer with an ATR attachment. Mass spectra were recorded on a Waters LCT Premier mass spectrometer using electrospray (ES) ionisation. UV-vis experiments were performed on a Cary 5000 UV-vis-NIR spectrometer and a handheld UV lamp (254 nm) was used for ring-opening of **1** and **2**. 5-Bromo-2,3,3-trimethyl-3H-indole<sup>2</sup> and  $[\text{Ru}(\text{dppe})_2\text{Cl}]\text{OTf}$ <sup>3</sup> were

prepared according to literature procedures. Other reagents were obtained from commercial suppliers and used as received.

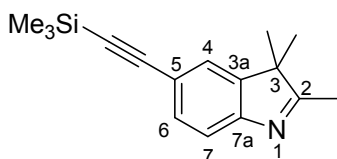

### 2,3,3-Trimethyl-5-((trimethylsilyl)ethynyl)-3H-indole (**3**)

A stirred mixture of 5-bromo-2,3,3-trimethyl-3H-indole (6.23 g, 27.6 mmol), Pd(PPh<sub>3</sub>)<sub>2</sub>Cl<sub>2</sub> (582 mg, 0.829 mmol, 3 mol%), CuI (158 mg, 0.831 mmol, 3 mol%) and trimethylsilylacetylene (7.90 mL, 55.5 mmol) in NEt<sub>3</sub> (90 mL) was heated under reflux for 2.25 h. After cooling to room temperature the reaction mixture was diluted with ether (100 mL) and washed with H<sub>2</sub>O (2 × 100 mL) and brine (100 mL). The organic phase was dried and evaporated, leaving a red-brown, oily residue. The residue was subjected to rapid silica filtration to give **3** as a yellow oil (4.86 g, 72%). R<sub>f</sub> (1:1 hexanes:EtOAc): 0.35; IR (ATR) ν<sub>max</sub> cm<sup>-1</sup>: 2154 (C≡C), 1575 (C=N), 1249 (Si-C); <sup>1</sup>H NMR (600 MHz, CDCl<sub>3</sub>): δ 7.43 (d, *J* = 7.8 Hz, 1H, H7), 7.41 (dd, *J* = 7.8, 1.2 Hz, 1H, H6) 7.38 (d, *J* = 1.2 Hz, 1H, H4), 2.27 (s, 3H, C2-Me), 1.28 (s, 6H, *gem*-Me), 0.25 (s, 9H, SiMe<sub>3</sub>); <sup>13</sup>C NMR (150 MHz, CDCl<sub>3</sub>) δ 189.6 (C2), 154.0 (C7a), 145.8 (C3a), 132.1 (C6), 125.2 (C4), 119.9 (C7), 119.8 (C5), 105.7 (SiC≡C), 93.9 (SiC≡C), 53.8 (C3), 23.1 (*gem*-Me), 15.6 (C2-CH<sub>3</sub>), 0.14 (SiMe<sub>3</sub>).

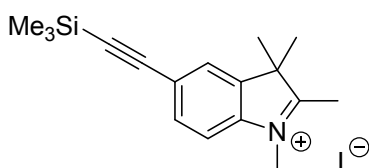

### 1,2,3,3-Tetramethyl-5-((trimethylsilyl)ethynyl)-3H-indolium iodide (**4**)

A black solution of **3** (4.84 g, 19.9 mmol) and MeI (2.5 mL, 40 mmol) in MeCN (30 mL) was heated under reflux for 4.5 h. The reaction mixture was cooled to room temperature and the solvent was evaporated. The residue was suspended in EtOAc (30 mL) and the solid was collected by vacuum filtration, washed with EtOAc and Et<sub>2</sub>O and air dried to give **4** as a dark grey solid (5.35 g, 70%). IR (ATR) ν<sub>max</sub> (cm<sup>-1</sup>): 2159 (C≡C), 1592 (C=N), 1245 (C-Si); <sup>1</sup>H NMR (600 MHz, CDCl<sub>3</sub>): δ 7.65 (dd, *J* = 8.4, 1.2 Hz, 1H, H6), 7.61 (d, *J* = 8.4 Hz, 1H, H7), 7.59 (m, 1H, H4), 4.26 (s, 3H, NCH<sub>3</sub>), 3.12 (s, 3H, C2-Me), 1.66 (s, 6H, *gem*-Me), 0.27 (s, 9H, SiMe<sub>3</sub>); <sup>13</sup>C NMR (150 MHz, CDCl<sub>3</sub>): δ 196.8 (C2), 141.5, 141.4, 133.4 (C6), 126.8 (C4), 125.8 (C5), 115.3 (C7), 102.9 (SiC≡C), 98.9 (SiC≡C), 54.8 (C3), 37.6 (N-Me), 23.3 (*gem*-Me), 17.6 (C2-CH<sub>3</sub>), -0.1 (SiMe<sub>3</sub>); HRMS (ES+) calcd for C<sub>17</sub>H<sub>24</sub>NSi<sup>+</sup>: 270.1678, found 270.1679.

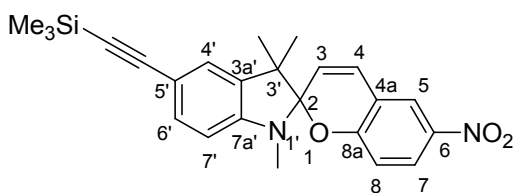

### 1',3',3'-Trimethyl-6-nitro-5'-((trimethylsilyl)ethynyl)spiro[chromene-2,2'-indoline] (**5**)

A stirred solution of 5-nitrosalicylaldehyde (407 mg, 2.43 mmol), **4** (888 mg, 2.31 mmol) and piperidine (456 mg, 5.36 mmol) in EtOH (50 mL) was heated under reflux under Ar for 1.75 h. The solvent was evaporated and the residue was redissolved in DCM (50 mL). The solution was washed with Na<sub>2</sub>CO<sub>3</sub> (50 mL), water (50 mL) and brine (50 mL), dried and evaporated. An attempt to recrystallize the product from DCM/hexanes led to the precipitation of a brown solid, which was filtered off. The mother liquors were evaporated to give **5** as a yellow-brown solid (931 mg, 2.23 mmol, 97%). R<sub>f</sub> (20% EtOAc/hexanes): 0.7; IR (ATR)  $\nu_{\max}$  (cm<sup>-1</sup>): 2147 (C≡C); <sup>1</sup>H NMR (600 MHz, CDCl<sub>3</sub>):  $\delta$  8.02 (dd, *J* = 8.7, 2.7 Hz, 1H, H7), 8.00 (d, *J* = 2.4 Hz, 1H, H5), 7.35 (dd, *J* = 8.1, 1.5 Hz, 1H, H6'), 7.18 (d, *J* = 1.6 Hz, 1H, H4'), 6.93 (d, *J* = 10.2 Hz, 1H, H4), 6.74 (d, *J* = 9.0 Hz, 1H, H8), 6.46 (d, *J* = 7.8 Hz, 1H, H7'), 5.83 (d, *J* = 10.2 Hz, 1H, H3), 2.74 (s, 3H, N-Me), 1.27 (s, 3H, *gem*-Me<sub>a</sub>), 1.16 (s, 3H, *gem*-Me<sub>b</sub>), 0.24 (s, 9H, SiMe<sub>3</sub>); <sup>13</sup>C NMR (150 MHz, CDCl<sub>3</sub>):  $\delta$  159.6 (C8a), 148.1 (C7a'), 141.3 (C6), 136.3 (C3a'), 132.7 (C6'), 128.6 (C4), 126.1 (C7), 125.6 (C4'), 122.9 (C5), 121.3 (C3), 118.7 (C4a), 115.6 (C8), 114.0 (C5'), 106.9 (C7'), 106.4 (SiC≡C), 106.3 (C2), 91.7 (SiC≡C), 52.2 (C3'), 28.9 (N-Me), 25.8 (*gem*-Me<sub>a</sub>), 20.0 (*gem*-Me<sub>b</sub>), 0.30 (SiMe<sub>3</sub>); HRMS (ES+) calcd for C<sub>24</sub>H<sub>27</sub>N<sub>2</sub>O<sub>3</sub>Si<sup>+</sup> [M + H]<sup>+</sup> 419.1791, found 419.1778.

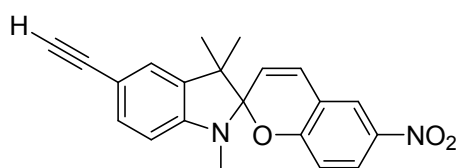

#### 5'-Ethynyl-1',3',3'-trimethyl-6-nitrospiro[chromene-2,2'-indoline] (**1**)

A solution of KOH (121 mg, 2.16 mmol) in MeOH (10 mL) was added to a stirred solution of **5** (628 mg, 1.50 mmol) in THF (20 mL). The combined solution was stirred for 1 h under Ar in the dark. The solvent was evaporated and the residue was dissolved in DCM (20 mL). The solution was washed with water (2 × 20 mL). The yellow aqueous washes were then back-extracted with CHCl<sub>3</sub> (2 × 20 mL). The combined organic phase was washed with brine (50 mL), dried and evaporated giving **1** as a yellow-brown powder (464 mg, 89%).  $\delta$  8.03 (dd, *J* = 8.7, 2.7 Hz, 1H, H7), 8.01 (d, *J* = 3.0 Hz, 1H, H5), 7.37 (dd, *J* = 8.4, 1.8 Hz, 1H, H6'), 7.20 (d, *J* = 1.8 Hz, 1H, H4'), 6.94 (d, *J* = 10.2 Hz, 1H, H4), 6.77 (d, *J* = 8.4 Hz, 1H, H8), 6.48 (d, *J* = 7.8 Hz, 1H, H7'), 5.83 (d, *J* = 10.2 Hz, 1H, H3), 3.00 (s, 1H, HC≡C), 2.75 (s, 3H, N-Me), 1.28 (s, 3H, *gem*-Me<sub>a</sub>), 1.18 (s, 3H, *gem*-Me<sub>b</sub>); IR (ATR)  $\nu_{\max}$  (cm<sup>-1</sup>): 3257 (HC≡) 2096 (C≡C); <sup>13</sup>C NMR (150 MHz, CDCl<sub>3</sub>):  $\delta$  159.6 (C8a), 148.3 (C7a'), 141.3 (C6), 136.5 (C3a'), 132.8 (C6'), 128.7 (C4), 126.1 (C7), 125.7 (C4'), 122.9 (C5), 121.2 (C3), 118.6 (C4a), 115.6 (C8), 112.8 (C5'), 106.9 (C7'), 106.2 (C2), 84.8 (HC≡C), 75.2 (HC≡C), 52.2 (C3'), 28.9 (N-Me), 25.9 (*gem*-Me<sub>a</sub>), 20.0 (*gem*-Me<sub>b</sub>). The <sup>1</sup>H NMR data agree with those previously reported.<sup>4</sup>

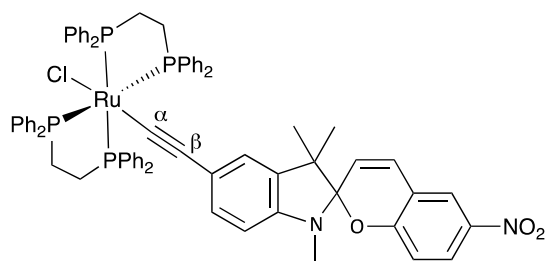

#### *trans*-((1',3',3'-Trimethyl-6-nitrospiro[chromene-2,2'-indolin]-5'-yl)ethynyl) ruthenium(II)(dppe)<sub>2</sub>chloride (**2**)

A dark red solution of [Ru(dppe)<sub>2</sub>Cl]OTf (217 mg, 0.200 mmol) and **1** (69 mg, 0.20 mmol) in DCM (5 mL) was stirred for 2 h under Schlenk conditions. A saturated solution of NaOBu<sup>t</sup> in dry MeOH (5 mL added via cannula, resulting in a dark green/yellow solution. Most of the solvent was evaporated to give a

suspension. The precipitate was collected by vacuum filtration and air-dried to give **2** as a dark green powder (190 mg, 74%\*). IR (ATR)  $\nu_{\max}$  ( $\text{cm}^{-1}$ ): 2041 ( $\text{C}\equiv\text{C}$ );  $^1\text{H}$  NMR (600 MHz,  $\text{C}_6\text{D}_6$ )  $\delta$  7.74 (br m, 8H, *o*-Ph), 7.72 (d,  $J = 3$  Hz, 1H, H5), 7.66 (br m, 8H, *o*-Ph'), 7.64 (dd,  $J = 9, 3$  Hz, 1H, H7), 7.53 (dd,  $J = 7.8, 1.2$  Hz, 1H, H6'), 7.33 (d,  $J = 1.2$  Hz, 1H, H4'), 7.09 (m, 4H, *p*-Ph), 7.04 (m, 8H, *m*-Ph), 6.95 (m, 12H, *m*-Ph' + *p*-Ph'), 6.63 (d,  $J = 7.8$  Hz, 1H, H7'), 6.27 (d,  $J = 9$  Hz, 1H, H8), 6.18 (d,  $J = 10.2$  Hz, 1H, H4), 5.48 (d,  $J = 10.2$  Hz, 1H, H3), 2.60 (s, 3H, N-CH<sub>3</sub>), 2.49 (br m, 4H, PCH<sub>2</sub>), 1.96 (br m, 4H, P'CH<sub>2</sub>), 1.55 (s, 3H, *gem*-CH<sub>3a</sub>), 1.31 (s, 3H, *gem*-CH<sub>3b</sub>);  $^{13}\text{C}$  NMR (150 MHz,  $\text{C}_6\text{D}_6$ )  $\delta$  159.9 (C8a), 144.1 (C7a'), 141.5 (C6), 139.9 (*ipso*-Ph'), 138.9 (*ipso*-Ph), 135.9 (C3a'), 134.7 (*o*-Ph), 134.2 (*o*-Ph'), 129.7 (C6'), 128.8 (*p*-Ph'), 128.5 (*p*-Ph), 128.4 (C4), 127.4 (*m*-Ph'), 127.3 (*m*-Ph), 127.0 (quint,  $J = 12.4$  Hz, Ru-C $\equiv$ C), 126.0 (C7), 125.3 (C5'), 124.5 (C4'), 122.9 (C5), 121.5 (C3), 118.9 (C4a), 116.3 (Ru-C $\equiv$ C), 115.4 (C8), 107.5 (C7'), 106.9 (C2), 52.6 (C3'), 33.2 (m, PCH<sub>2</sub>CH<sub>2</sub>P), 29.1 (N-CH<sub>3</sub>), 26.4 (*gem*-CH<sub>3a</sub>), 20.8 (*gem*-CH<sub>3b</sub>);  $^{31}\text{P}$  NMR (121.5 MHz,  $\text{C}_6\text{D}_6$ )  $\delta$  69.4. HRMS (ES+) calcd for  $\text{C}_{73}\text{H}_{65}\text{N}_2\text{O}_3\text{P}_4^{102}\text{Ru}^+ [\text{M} - \text{Cl}]^+$  1243.2989, found 1243.2994. Anal. \* Calcd for  $\text{C}_{73}\text{H}_{65}\text{N}_2\text{O}_3\text{P}_4\text{ClRu}$ : C, 68.57; H, 5.12; N, 2.19. Found: C, 66.54; H, 5.59; N, 2.17.

\*The sample was found to contain an impurity, predominantly dppeO<sub>2</sub> and identified in the spectra below. Chromatographic and other attempts to further purify the material were unsuccessful.

## S2.0 Spectra

### S2.1 $^1\text{H}$ and $^{13}\text{C}$ NMR spectra of 1

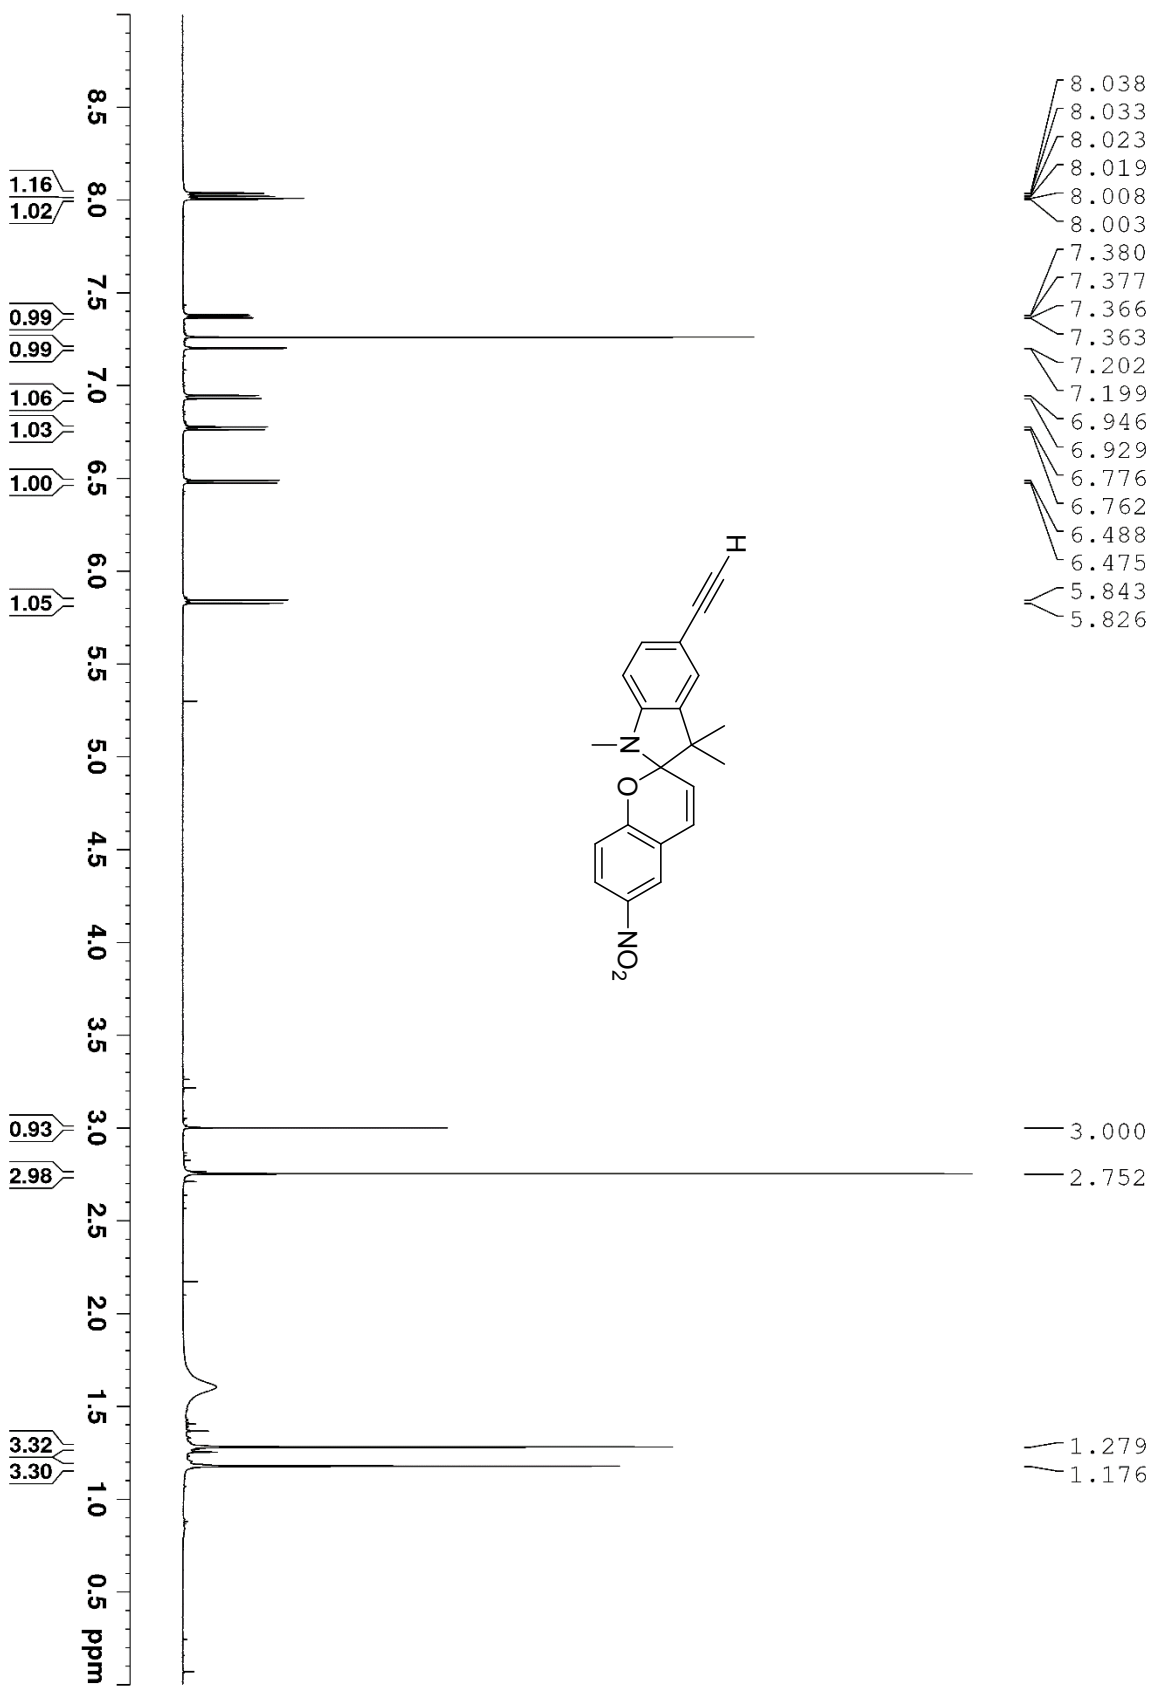

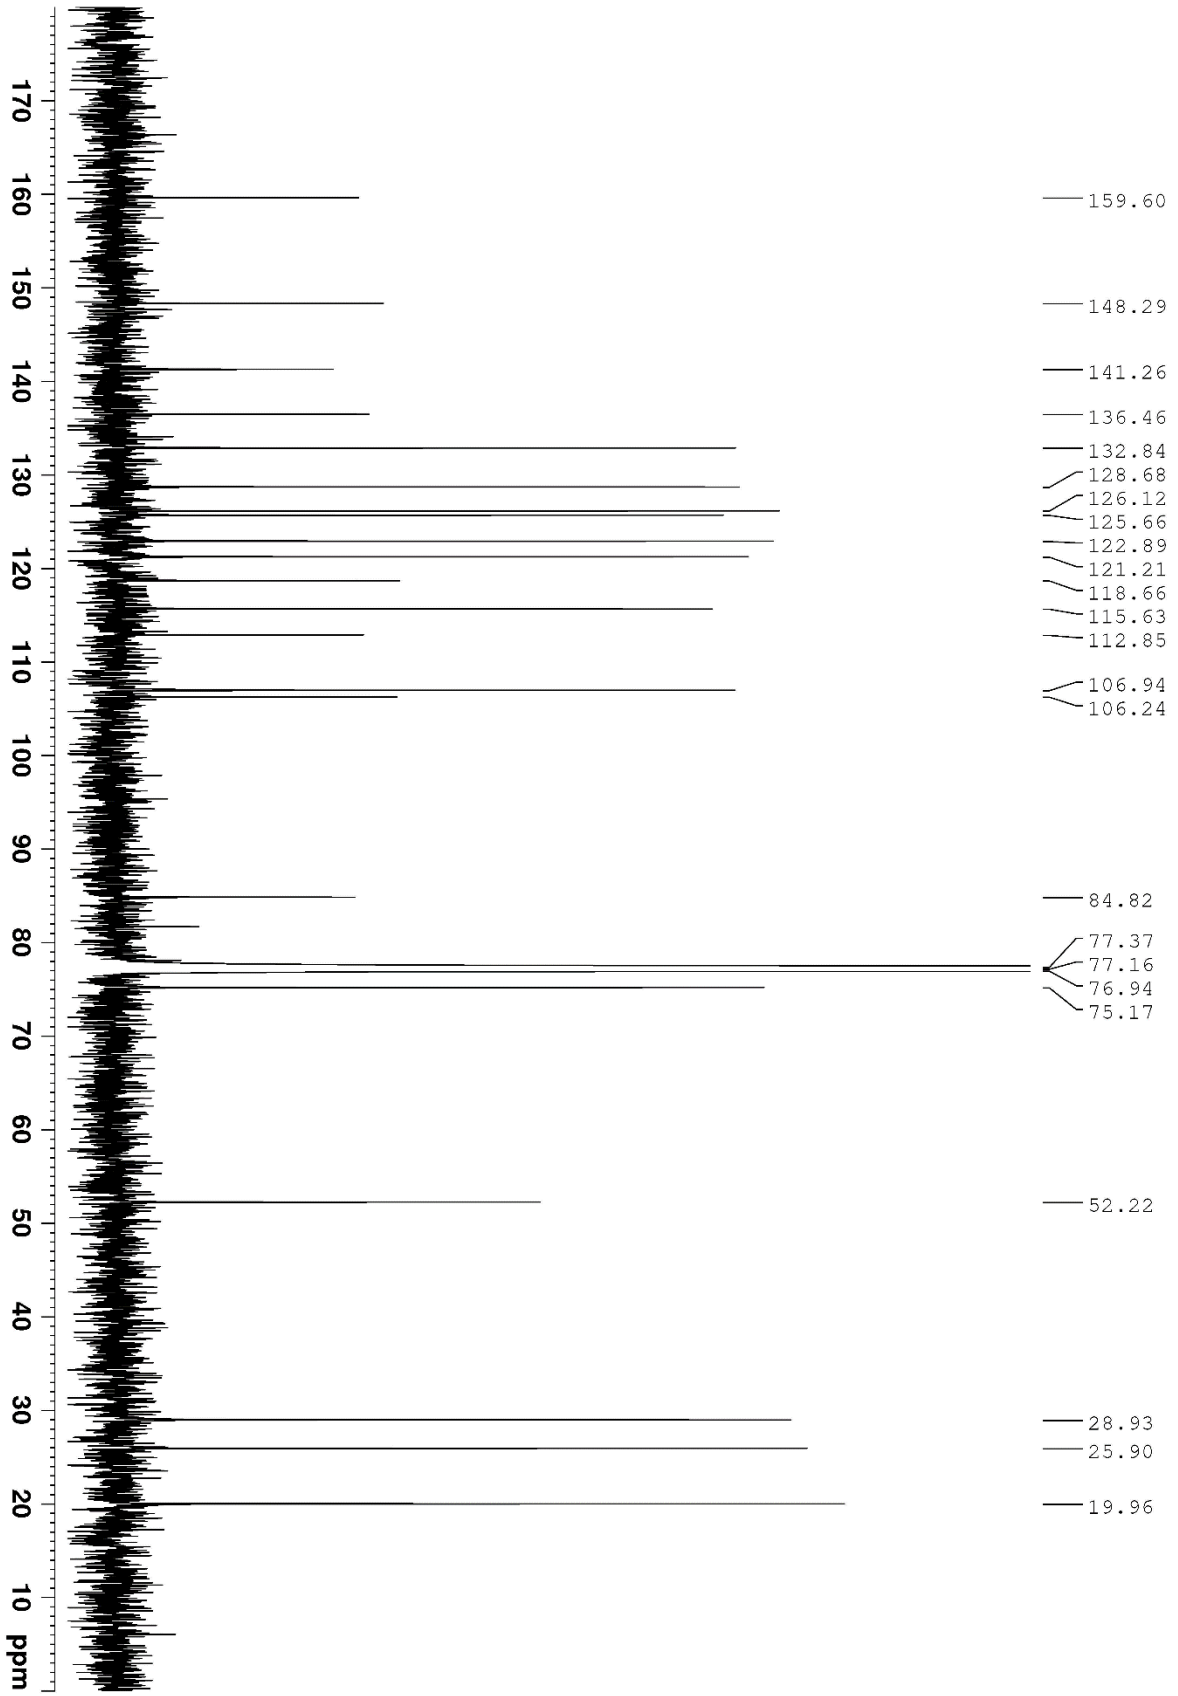

S2.2 <sup>1</sup>H, <sup>13</sup>C and <sup>31</sup>P NMR spectra of 2

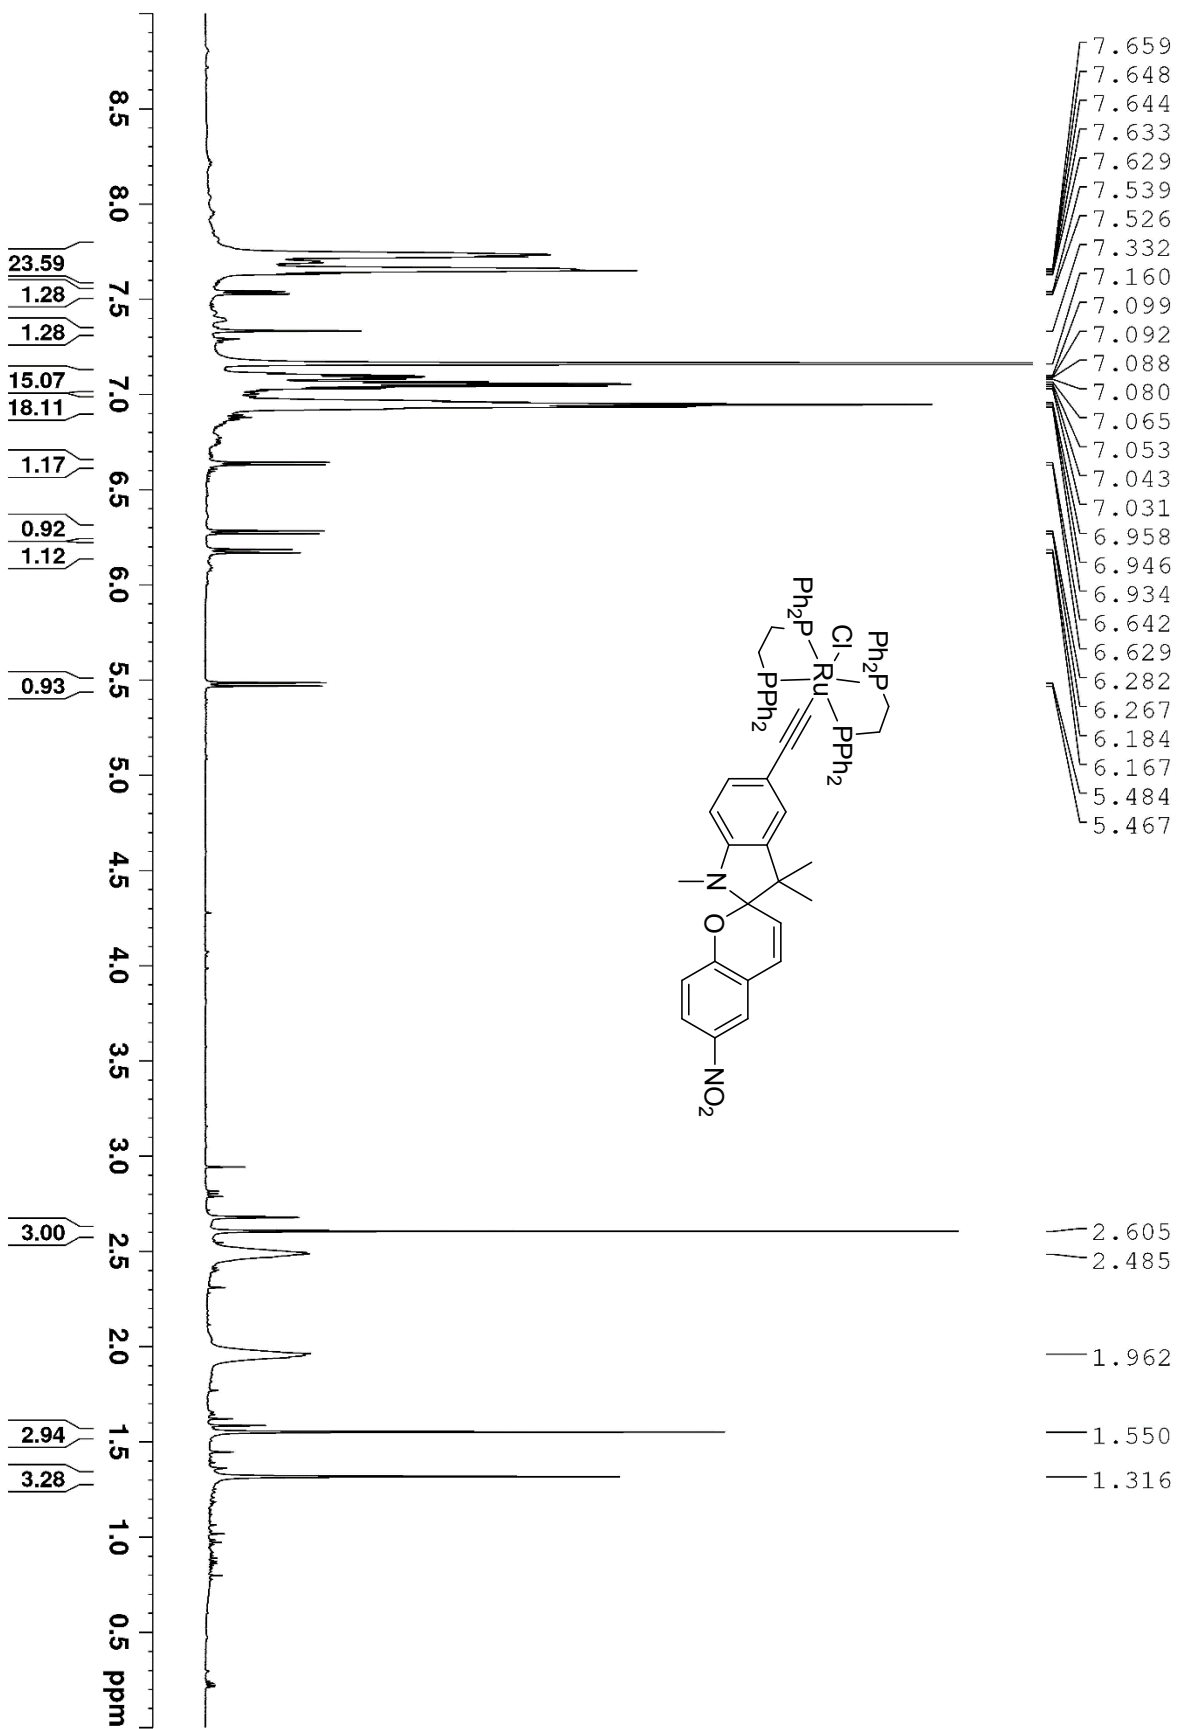

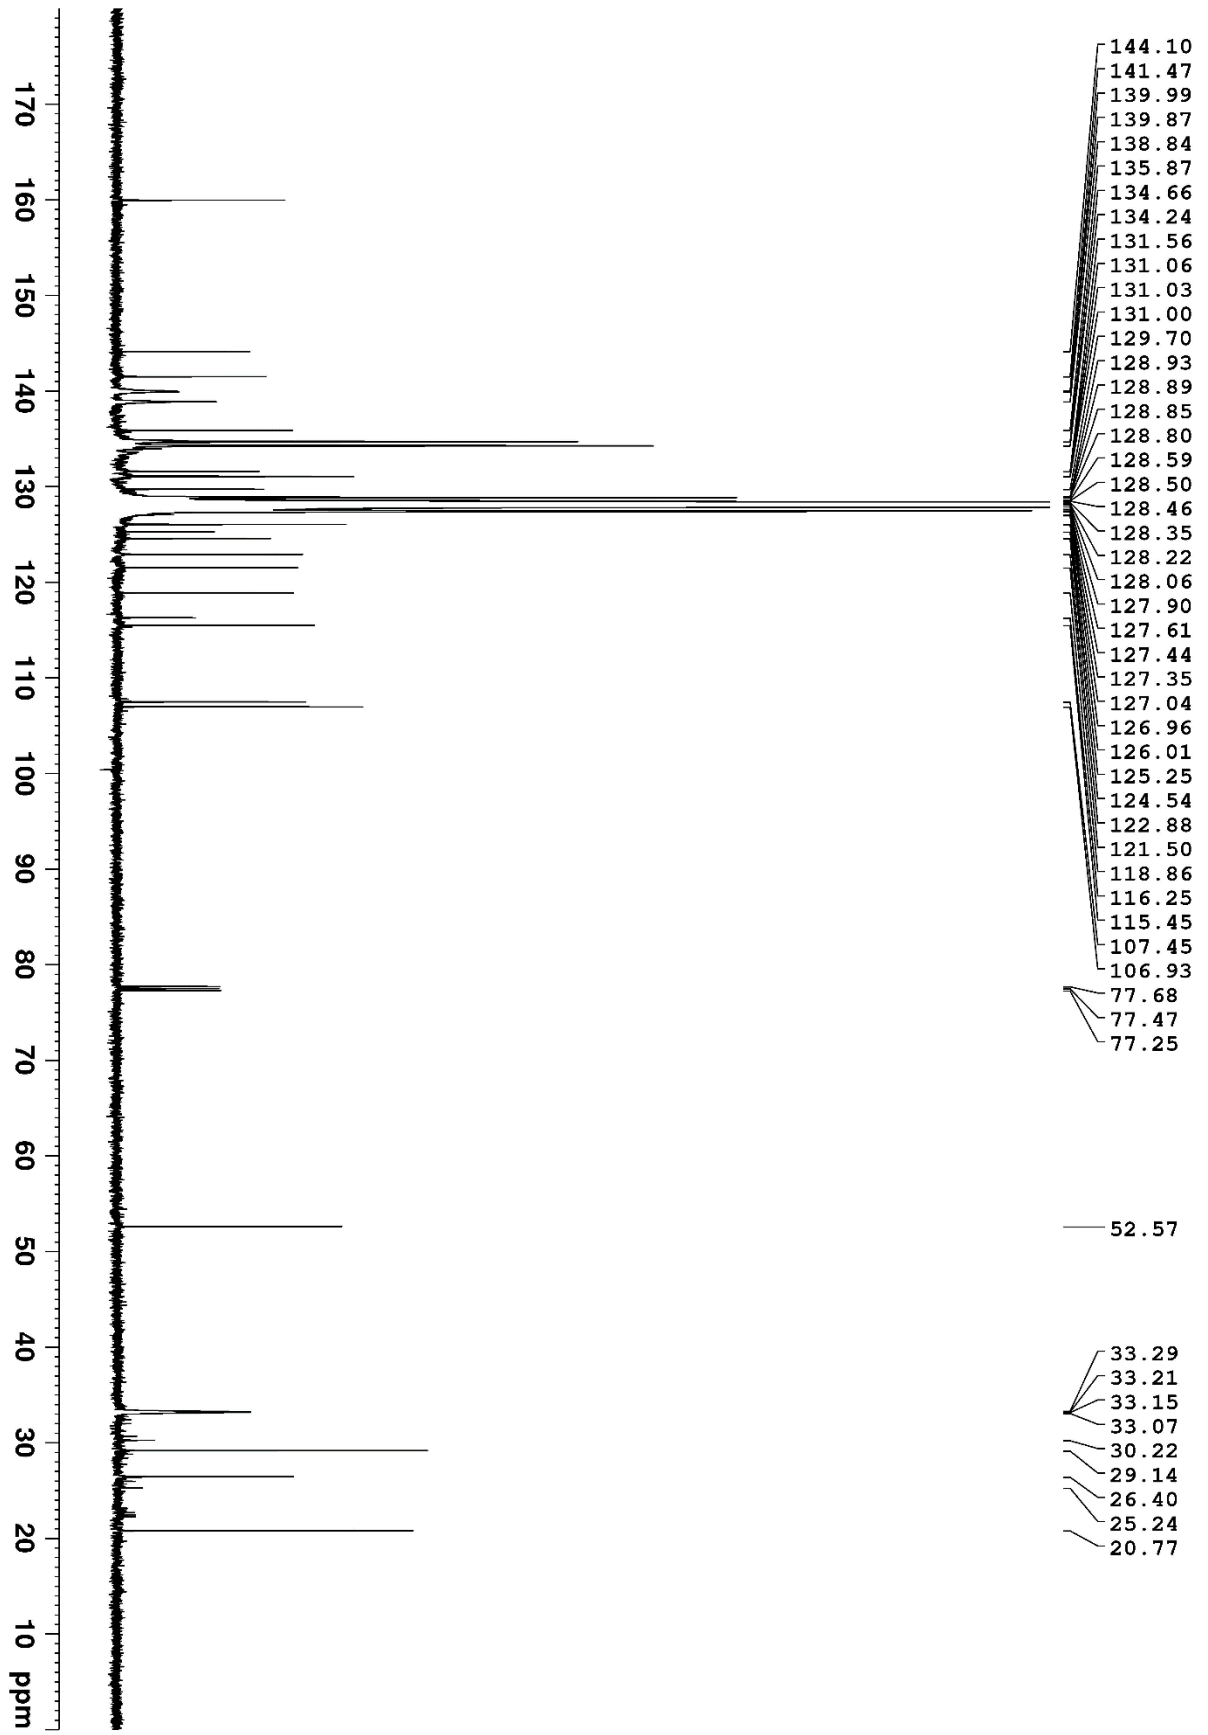



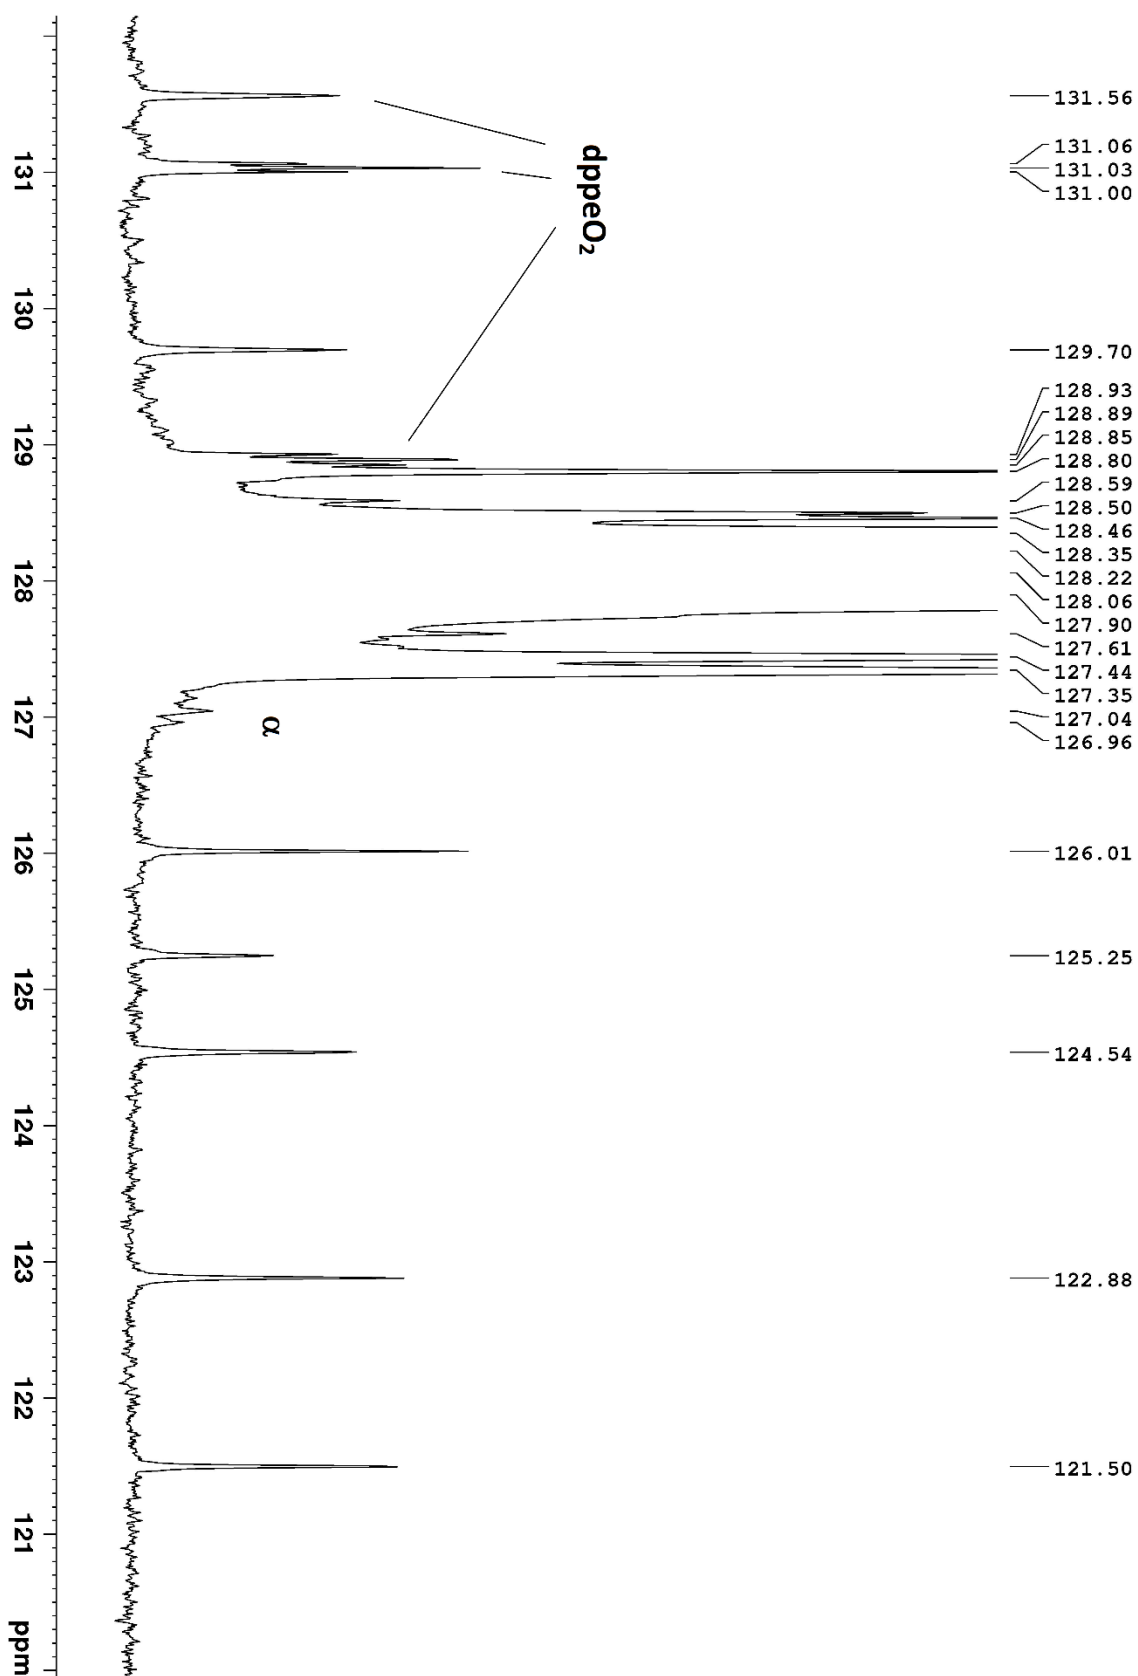

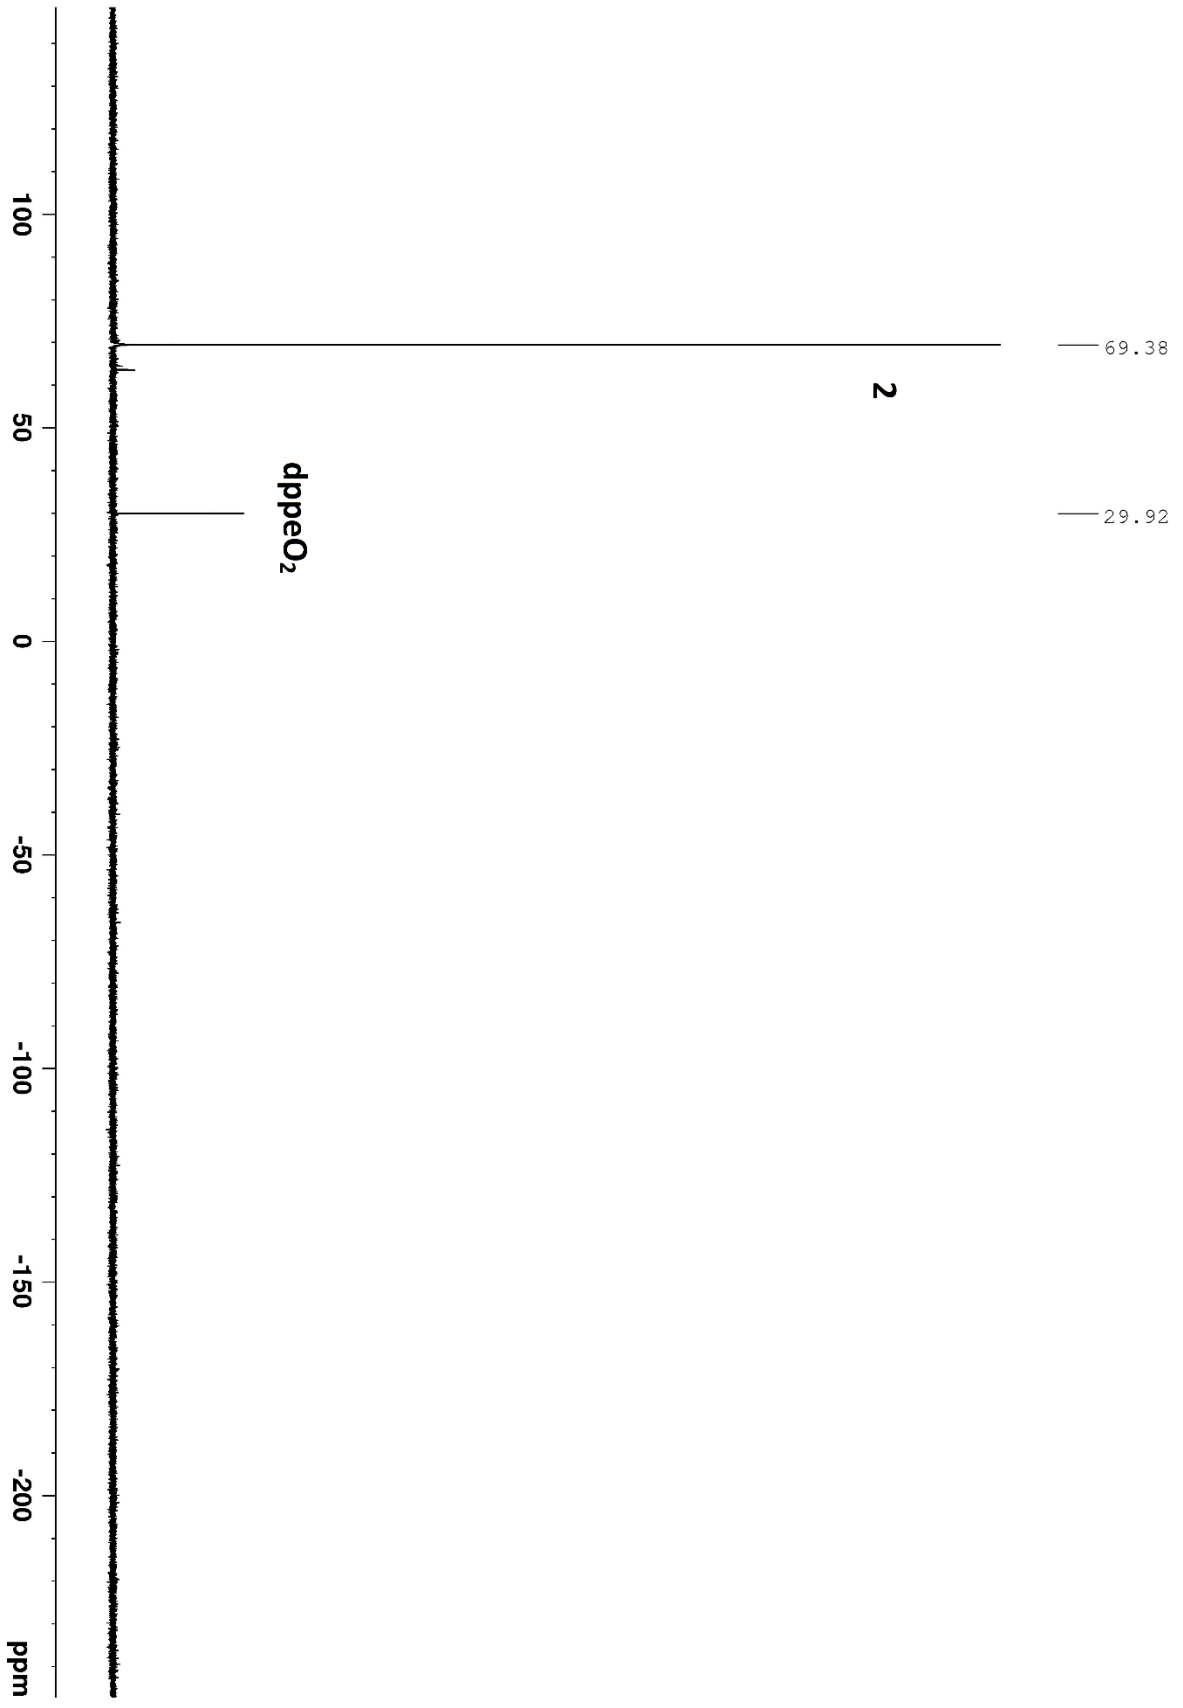

### S3.0 UV-Vis Experiments

#### S3.1 UV-Vis experiments on ligand 5'-ethynyl-1',3',3'-trimethyl-6-nitrospiro[chromene-2,2'-indoline] (**1**)

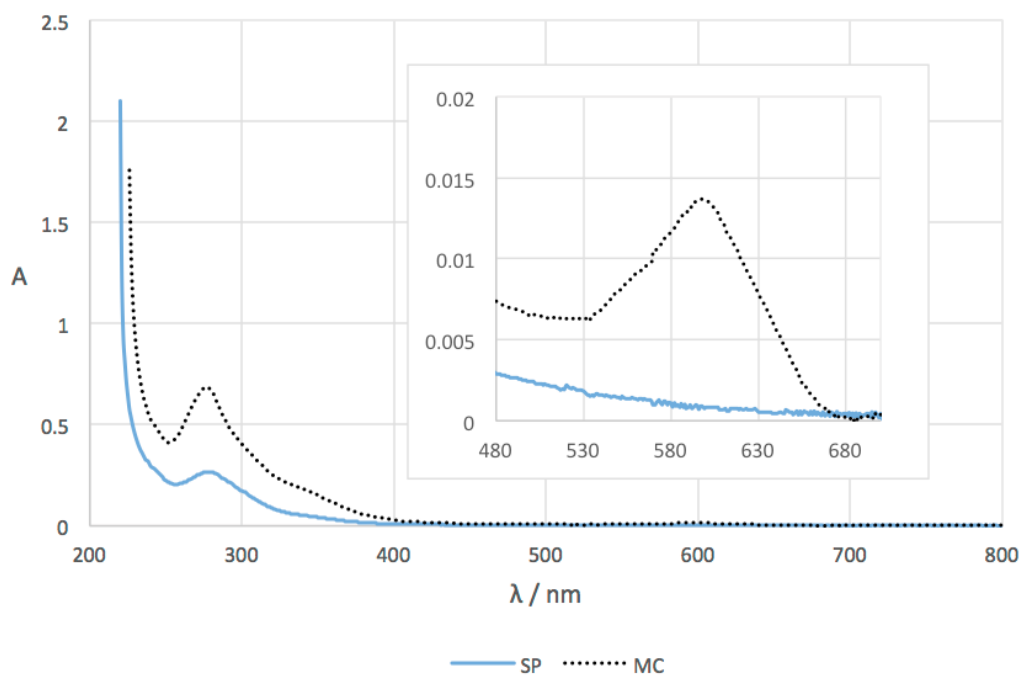

**Figure S2** Absorption spectra of **1** in THF at 20°C. SP: solution under ambient conditions. MC: after irradiation with 254 nm light for 5 minutes.

S3.1 UV-Vis experiments on *trans*-((1',3',3'-trimethyl-6-nitrospiro[chromene-2,2'-indolin]-5'-yl)ethynyl)ruthenium(II)(dppe)<sub>2</sub>chloride (**2**)

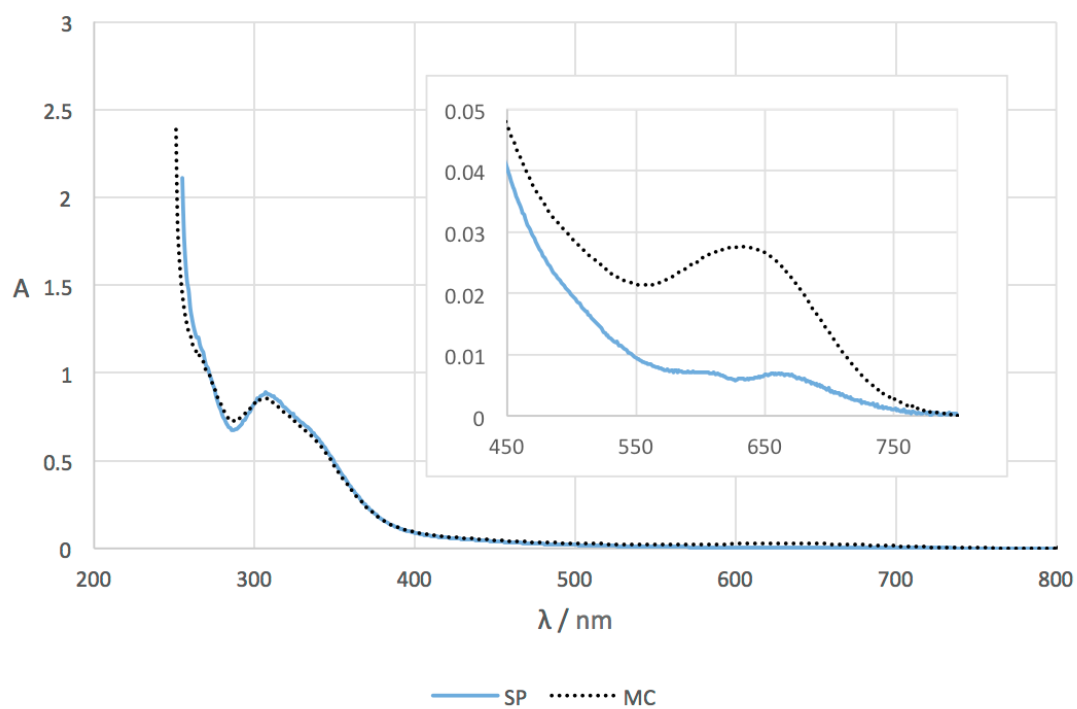

**Figure S3** Absorption spectra of **2** in THF at 20°C. SP: solution under ambient conditions. MC: after irradiation with 254 nm light for 5 minutes.

## S4.0 Theoretical Calculations

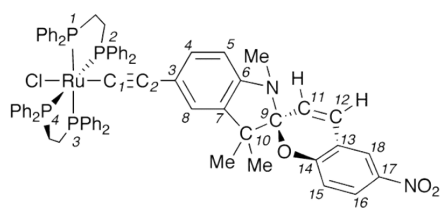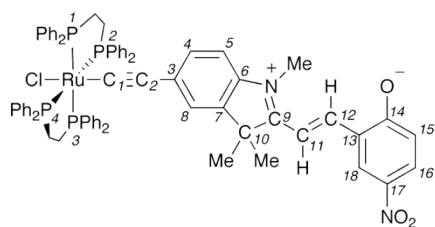

**Figure S4.** The atom labelling schemes used in the computational work

**Table S1.** Selected bond lengths (Å) and angles(°) for *trans*-RuCl(C≡CSPNO<sub>2</sub>)(dppe)<sub>2</sub> and *trans*-RuCl(C≡CMCNO<sub>2</sub>)(dppe)<sub>2</sub>

|          | HC≡CSPNO <sub>2</sub> | <i>trans</i> -RuCl(C≡CSPNO <sub>2</sub> )(dppe) <sub>2</sub><br>closed | HC≡CMCNO <sub>2</sub> | <i>trans</i> -RuCl(C≡CMCNO <sub>2</sub> )(dppe) <sub>2</sub><br>open |
|----------|-----------------------|------------------------------------------------------------------------|-----------------------|----------------------------------------------------------------------|
| Ru-Cl    |                       | 2.578                                                                  |                       | 2.570                                                                |
| Ru-P1    |                       | 2.399                                                                  |                       | 2.380                                                                |
| Ru-P2    |                       | 2.425                                                                  |                       | 2.425                                                                |
| Ru-P3    |                       | 2.397                                                                  |                       | 2.404                                                                |
| Ru-P4    |                       | 2.409                                                                  |                       | 2.419                                                                |
| Ru-C1    |                       | 2.011                                                                  |                       | 2.003                                                                |
| C1-C2    | 1.211                 | 1.232                                                                  | 1.209                 | 1.233                                                                |
| C2-C3    | 1.428                 | 1.426                                                                  | 1.428                 | 1.420                                                                |
| C3-C4    | 1.408                 | 1.411                                                                  | 1.410                 | 1.415                                                                |
| C4-C5    | 1.398                 | 1.400                                                                  | 1.396                 | 1.396                                                                |
| C5-C6    | 1.395                 | 1.391                                                                  | 1.391                 | 1.391                                                                |
| C6-C7    | 1.411                 | 1.405                                                                  | 1.402                 | 1.401                                                                |
| C7-C8    | 1.377                 | 1.379                                                                  | 1.381                 | 1.379                                                                |
| C3-C8    | 1.420                 | 1.423                                                                  | 1.415                 | 1.421                                                                |
| C6-N     | 1.398                 | 1.412                                                                  | 1.424                 | 1.426                                                                |
| N-C9     | 1.455                 | 1.450                                                                  | 1.360                 | 1.367                                                                |
| C9-C10   | 1.586                 | 1.586                                                                  | 1.543                 | 1.546                                                                |
| C7-C10   | 1.527                 | 1.528                                                                  | 1.519                 | 1.521                                                                |
| C9-C11   | 1.499                 | 1.500                                                                  | 1.394                 | 1.386                                                                |
| C11-C12  | 1.340                 | 1.340                                                                  | 1.388                 | 1.397                                                                |
| C12-C13  | 1.456                 | 1.453                                                                  | 1.408                 | 1.397                                                                |
| C13-C14  | 1.413                 | 1.413                                                                  | 1.488                 | 1.493                                                                |
| C14-C15  | 1.404                 | 1.404                                                                  | 1.461                 | 1.463                                                                |
| C15-C16  | 1.384                 | 1.384                                                                  | 1.357                 | 1.356                                                                |
| C16-C17  | 1.398                 | 1.396                                                                  | 1.428                 | 1.431                                                                |
| C17-C18  | 1.391                 | 1.389                                                                  | 1.376                 | 1.369                                                                |
| C18-C13  | 1.392                 | 1.392                                                                  | 1.407                 | 1.412                                                                |
| C14-O    | 1.365                 | 1.365                                                                  | 1.261                 | 1.258                                                                |
| C17-N    | 1.446                 | 1.451                                                                  | 1.430                 | 1.441                                                                |
| C9-O     | 1.522                 | 1.526                                                                  |                       |                                                                      |
| Cl-Ru-C1 |                       | 175.08                                                                 |                       | 175.62                                                               |
| Ru-C1-C2 |                       | 176.80                                                                 |                       | 176.62                                                               |
| C1-C2-C3 |                       | 175.20                                                                 |                       | 175.25                                                               |
| P1-Ru-P2 |                       | 82.96                                                                  |                       | 82.88                                                                |
| P2-Ru-P3 |                       | 98.22                                                                  |                       | 98.31                                                                |
| P3-Ru-P4 |                       | 82.13                                                                  |                       | 82.22                                                                |
| P4-Ru-P1 |                       | 96.67                                                                  |                       | 96.59                                                                |

**Table S2.** Frontier orbital energies (eV) and composition (%).

| RuCCSPNO2 |     |      |       |        |        |    |      |      |   |    |    |      |       |          |
|-----------|-----|------|-------|--------|--------|----|------|------|---|----|----|------|-------|----------|
| MO        |     | eV   | Cl    | dppe-1 | dppe-2 | Ru | C1C2 | C6H3 | N | Me | C9 | CMe2 | CH=CH | C6H3ONO2 |
|           | 332 | LUMO | -2.59 | 0      | 0      | 0  | 0    | 0    | 0 | 0  | 0  | 0    | 0     | 100      |
|           | 331 | HOMO | -4.65 | 2      | 2      | 25 | 28   | 29   | 9 | 1  | 0  | 0    | 0     | 1        |

  

| HCCSPNO2 |    |      |       |  |  |   |      |      |    |    |    |      |       |          |
|----------|----|------|-------|--|--|---|------|------|----|----|----|------|-------|----------|
| MO       |    | eV   |       |  |  | H | C1C2 | C6H3 | N  | Me | C9 | CMe2 | CH=CH | C6H3ONO2 |
|          | 92 | LUMO | -2.63 |  |  | 0 | 0    | 0    | 0  | 0  | 0  | 0    | 0     | 100      |
|          | 91 | HOMO | -5.55 |  |  | 0 | 14   | 49   | 27 | 4  | 1  | 1    | 1     | 4        |

  

| RuCCMCNO2 |     |      |       |        |        |    |      |      |   |    |    |      |       |          |
|-----------|-----|------|-------|--------|--------|----|------|------|---|----|----|------|-------|----------|
| MO        |     | eV   | Cl    | dppe-1 | dppe-2 | Ru | C1C2 | C6H3 | N | Me | C9 | CMe2 | CH=CH | C6H3ONO2 |
|           | 332 | LUMO | -2.77 | 0      | 0      | 0  | 1    | 5    | 7 | 1  | 15 | 2    | 24    | 43       |
|           | 331 | HOMO | -4.94 | 4      | 2      | 29 | 25   | 20   | 3 | 0  | 0  | 0    | 4     | 11       |

  

| HCCMCNO2 |    |      |       |  |  |   |      |      |   |    |    |      |       |          |
|----------|----|------|-------|--|--|---|------|------|---|----|----|------|-------|----------|
| MO       |    | eV   |       |  |  | H | C1C2 | C6H3 | N | Me | C9 | CMe2 | CH=CH | C6H3ONO2 |
|          | 92 | LUMO | -2.92 |  |  | 0 | 1    | 7    | 7 | 1  | 17 | 3    | 24    | 40       |
|          | 91 | HOMO | -5.52 |  |  | 0 | 2    | 9    | 8 | 1  | 2  | 1    | 11    | 66       |

**Table S3** Mulliken charges of selected atoms

|      | HC≡CSPNO <sub>2</sub> | <i>trans</i> -<br>RuCl(C≡CSPNO <sub>2</sub> )(dppe) <sub>2</sub> | HC≡CMCNO <sub>2</sub> | <i>trans</i> -<br>RuCl(C≡CMCNO <sub>2</sub> )(dppe) <sub>2</sub> |
|------|-----------------------|------------------------------------------------------------------|-----------------------|------------------------------------------------------------------|
| Ru   |                       | 0.664288                                                         |                       | 0.779694                                                         |
| Cl   |                       | -0.448428                                                        |                       | -0.515449                                                        |
| C1   | -0.376443             | -0.209644                                                        | -0.353014             | -0.207211                                                        |
| C2   | 0.085270              | -0.324956                                                        | 0.093052              | -0.296144                                                        |
| C3   | -0.126516             | -0.081955                                                        | -0.116088             | -0.101289                                                        |
| C6   | 0.400181              | 0.388143                                                         | 0.389289              | 0.361784                                                         |
| N-Me | -0.703329             | -0.717607                                                        | -0.830158             | -0.705063                                                        |
| C9   | 0.364140              | 0.381015                                                         | 0.507465              | 0.369264                                                         |
| C11  | -0.192474             | -0.178796                                                        | -0.234078             | -0.271496                                                        |
| C12  | -0.134820             | -0.135047                                                        | -0.136600             | -0.138190                                                        |
| C13  | -0.053479             | -0.043495                                                        | -0.092439             | -0.043123                                                        |
| C14  | 0.364615              | 0.348579                                                         | 0.366939              | 0.233393                                                         |
| O    | -0.567439             | -0.576747                                                        | -0.566301             | -0.520332                                                        |
|      |                       |                                                                  |                       |                                                                  |



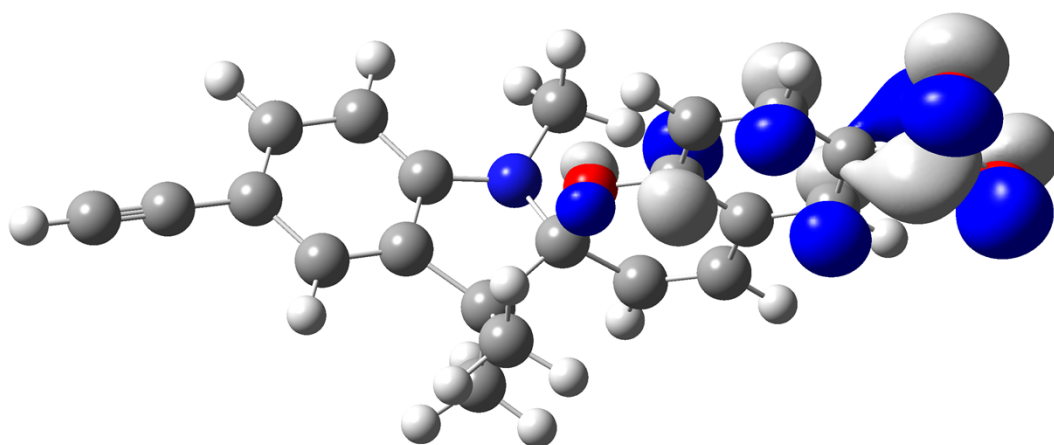

**Figure S5** LUMO HCCSPNO<sub>2</sub> (plotted with contour values  $\pm 0.04$  (e/bohr<sup>3</sup>)<sup>1/2</sup>)

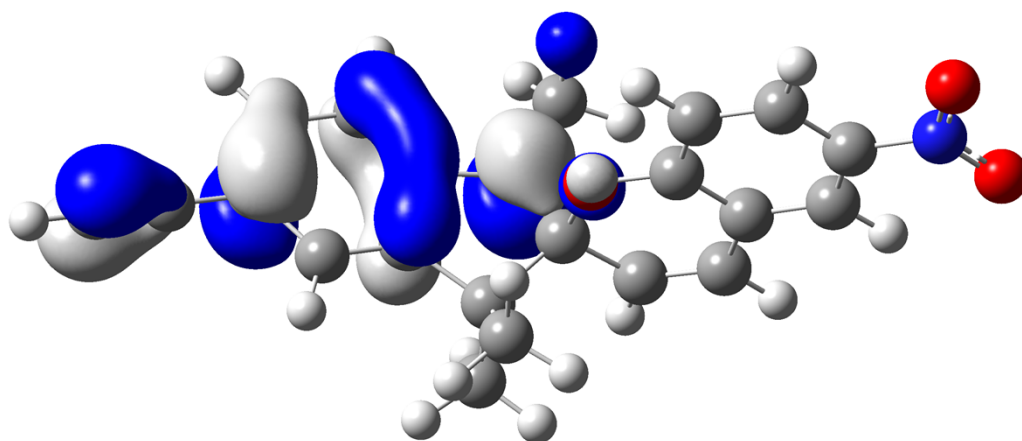

**Figure S6** HOMO HCCSPNO<sub>2</sub> (plotted with contour values  $\pm 0.04$  (e/bohr<sup>3</sup>)<sup>1/2</sup>)

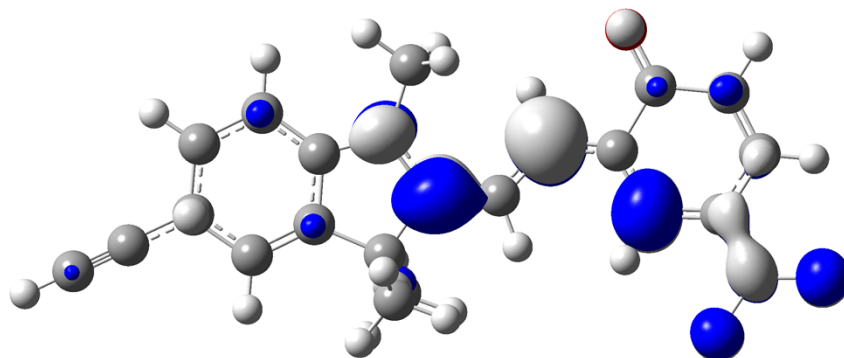

**Figure S7** LUMO HCCMCNO<sub>2</sub> (plotted with contour values  $\pm 0.04$  (e/bohr<sup>3</sup>)<sup>1/2</sup>)

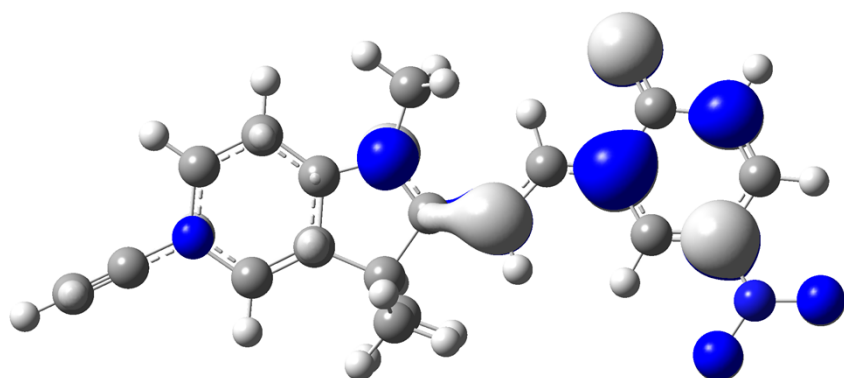

**Figure S8** HOMO HCCMCNO<sub>2</sub> (plotted with contour values  $\pm 0.04$  (e/bohr<sup>3</sup>)<sup>1/2</sup>)

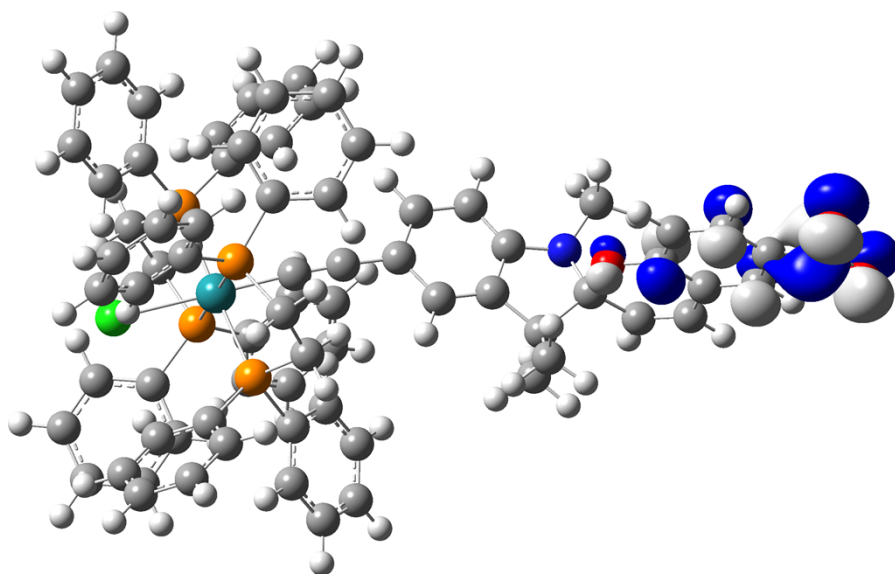

**Figure S9** LUMO RuCCSPNO<sub>2</sub> (plotted with contour values  $\pm 0.04$  (e/bohr<sup>3</sup>)<sup>1/2</sup>)

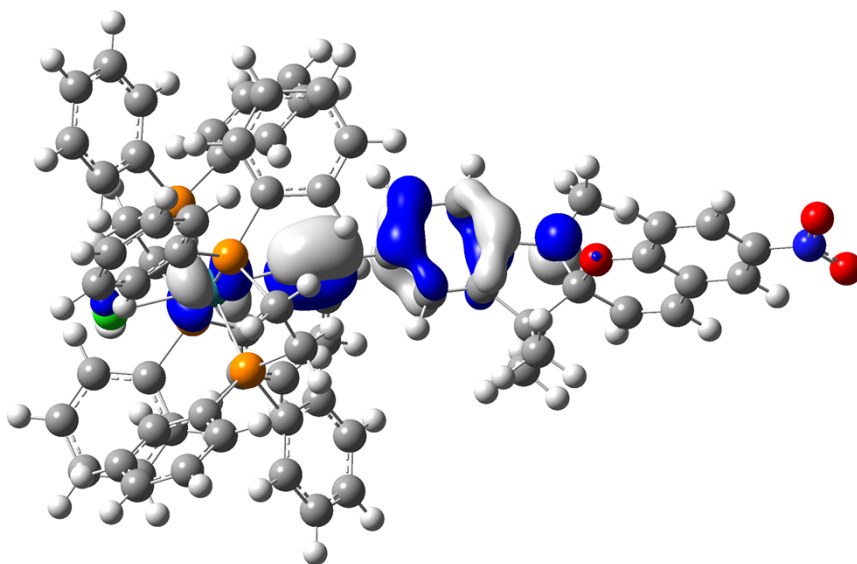

**Figure S10** HOMO RuCCSPNO<sub>2</sub> (plotted with contour values  $\pm 0.04$  (e/bohr<sup>3</sup>)<sup>1/2</sup>)

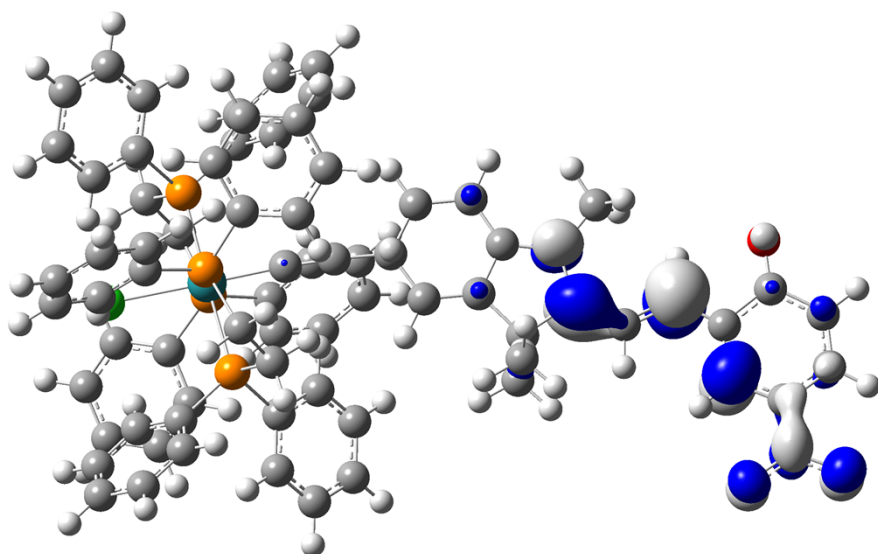

**Figure S11** LUMO RuCCMCNO<sub>2</sub> (plotted with contour values  $\pm 0.04$  (e/bohr<sup>3</sup>)<sup>1/2</sup>)

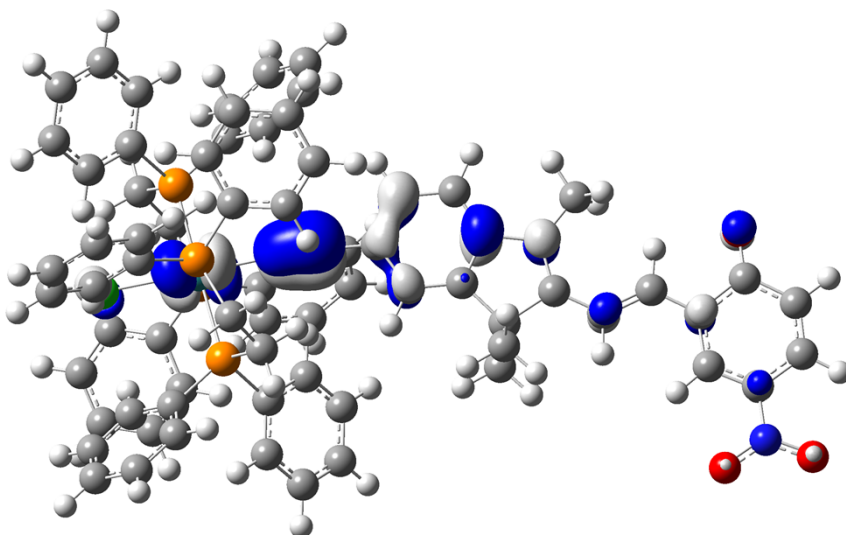

**Figure S12** HOMO RuCCMCNO<sub>2</sub> (plotted with contour values  $\pm 0.04$  (e/bohr<sup>3</sup>)<sup>1/2</sup>)

## References

- (1) Armarego, W. L. F.; Chai, C. L. L. *Purification of Laboratory Chemicals*; 5th ed.; Butterworth-Heinemann, 2003.
- (2) Reddington, M. V. *Bioconjugate Chemistry* **2007**, *18*, 2178.
- (3) Manuscript reference (35).
- (4) Manuscript reference (32).
